# Supplementary material for: Predictive value of total psoas muscle index for postoperative physical functional decline in older patients undergoing emergency abdominal surgery
Source: Springer Nature journal article supplement (doi:10.1186/s12893-023-02085-5), 2023-06-24
Supplement: MOESM1 [file 25533752]

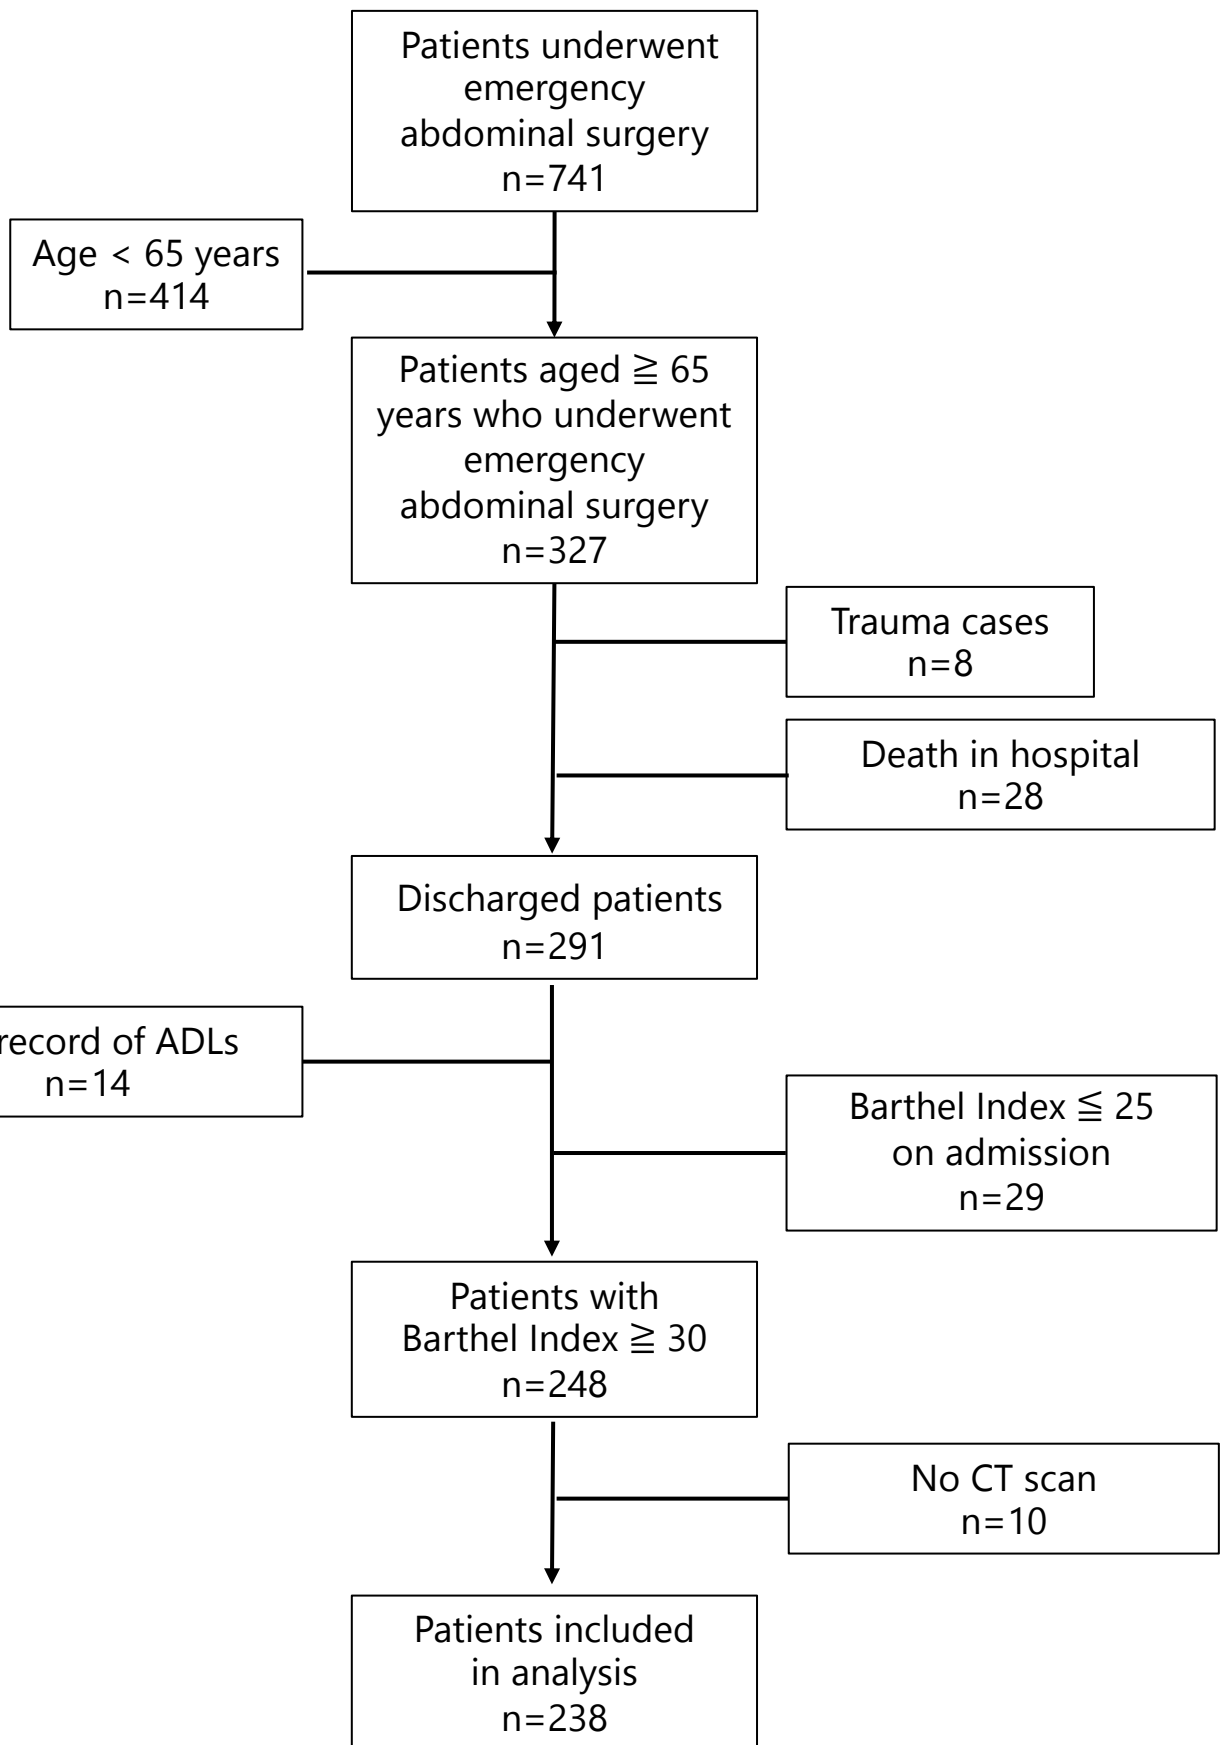

Appendix 1: Patient flow in this study
