# Supplementary material for: Predictive value of total psoas muscle index for postoperative physical functional decline in older patients undergoing emergency abdominal surgery
Source: Springer Nature journal article supplement (doi:10.1186/s12893-023-02085-5), 2023-06-24
Supplement: MOESM3 [file 25533752]

| Factor     | OR   | 95% CI      | p       |
|------------|------|-------------|---------|
| TPI        | 0.12 | (0.06–0.23) | < 0.001 |
| Male TPI   | 0.12 | (0.04–0.30) | < 0.001 |
| Female TPI | 0.17 | (0.06–0.44) | < 0.001 |

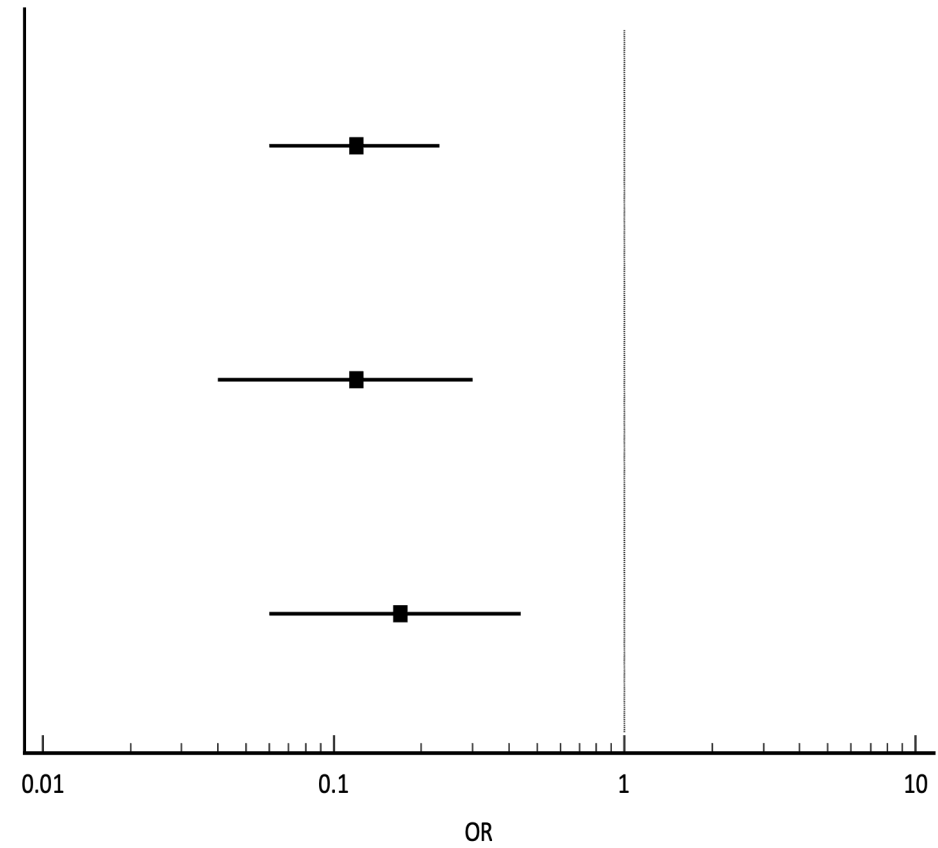

Appendix 3: Interaction analysis between the effect of total psoas muscle index and sex
